# Supplementary material
Source: PubMed Central journal article supplement (PMC8115503)
Supplement: 41386_2020_826_MOESM3_ESM.pdf [file 41386_2020_826_MOESM3_ESM.pdf]

**Table S2. Behavioral Summary**

| <b>Behavioral Test</b>                              | <b>Behavioral Test</b> | <b>Behavioral Output</b>        | <b>Sex</b> | <b>Leuprolide</b> |
|-----------------------------------------------------|------------------------|---------------------------------|------------|-------------------|
| Open Field                                          | OF                     | Locomotion                      | Male       | ▲                 |
|                                                     |                        |                                 | Female     | -                 |
| Light Dark Test                                     | LDT                    | Locomotion                      | Male       | ▲                 |
|                                                     |                        |                                 | Female     | -                 |
|                                                     |                        | Anxiety-like                    | Male       | -                 |
|                                                     |                        |                                 | Female     | -                 |
| Marble Burying                                      | MB                     | Compulsive-like                 | Male       | -                 |
|                                                     |                        |                                 | Female     | -                 |
| Social Interaction                                  | SI                     | Social interaction with males   | Male       | ▲                 |
|                                                     |                        |                                 | Female     | -                 |
|                                                     |                        | Social interaction with females | Male       | ▼                 |
|                                                     |                        |                                 | Female     | -                 |
| Novelty Suppressed Feeding                          | NSF                    | Hyponeophagia                   | Male       | -                 |
|                                                     |                        |                                 | Female     | ▲                 |
| Forced Swim Test                                    | FST                    | Depressive-like                 | Male       | -                 |
|                                                     |                        |                                 | Female     | ▲                 |
| Elevated Plus Maze                                  | EPM                    | Anxiety-like                    | Male       | -                 |
|                                                     |                        |                                 | Female     | -                 |
| Contextual Fear Discrimination / Pattern Separation | CFD / PS               | Cognition                       | Male       | -                 |
|                                                     |                        |                                 | Female     | -                 |
